# Supplementary material for: Narrow-Leafed Lupin (Lupinus angustifolius L.) Seeds Gamma-Conglutin is an Anti-Inflammatory Protein Promoting Insulin Resistance Improvement and Oxidative Stress Amelioration in PANC-1 Pancreatic Cell-Line
Source: MDPI journal article supplement (doi:10.3390/antiox9010012), 2019-12-23
Supplement: s1 [file s1]

## SUPPLEMENTARY MATERIAL

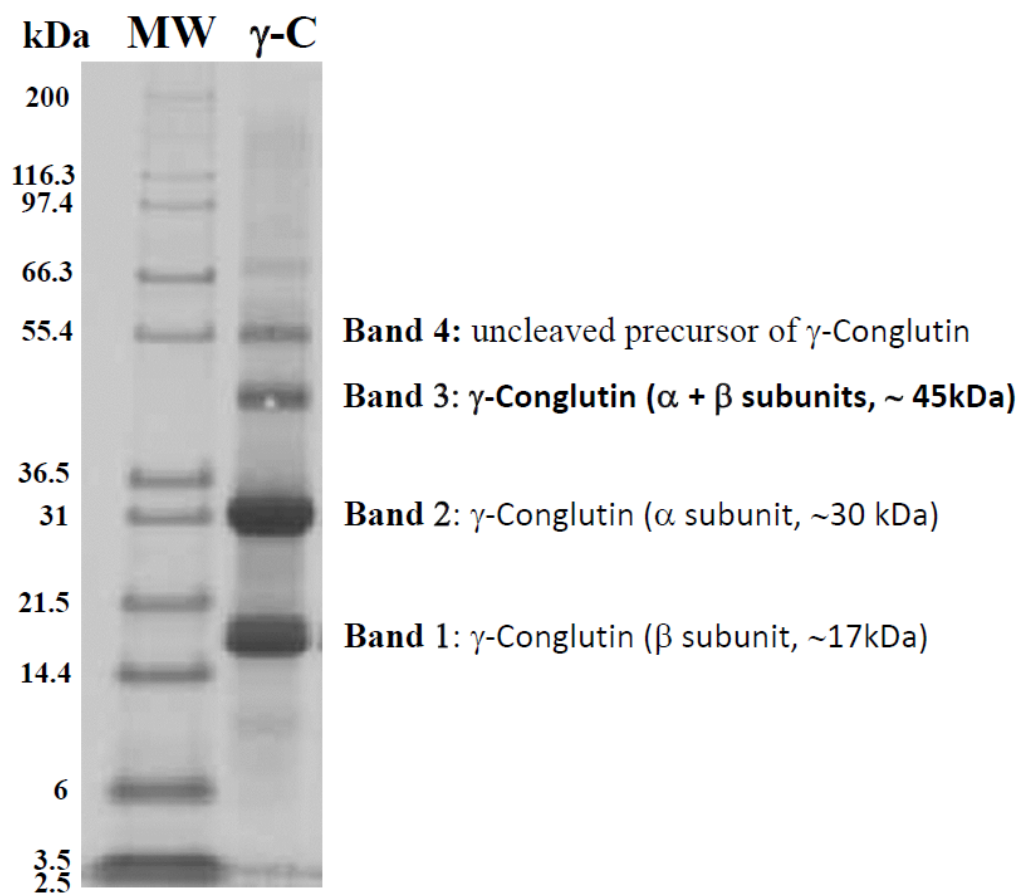

**Figure S1.** Isolation and purification of NLL seed  $\gamma$ -conglutin protein. SDS-PAGE of isolated and purified  $\gamma$ -conglutin protein, with high level of purity (>95%). Subunits  $\alpha$  and  $\beta$  of  $\gamma$ -conglutin, unreduced  $\gamma$ -conglutin, and uncleaved  $\gamma$ -conglutin precursor are present. MW, molecular weight standard (kDa).

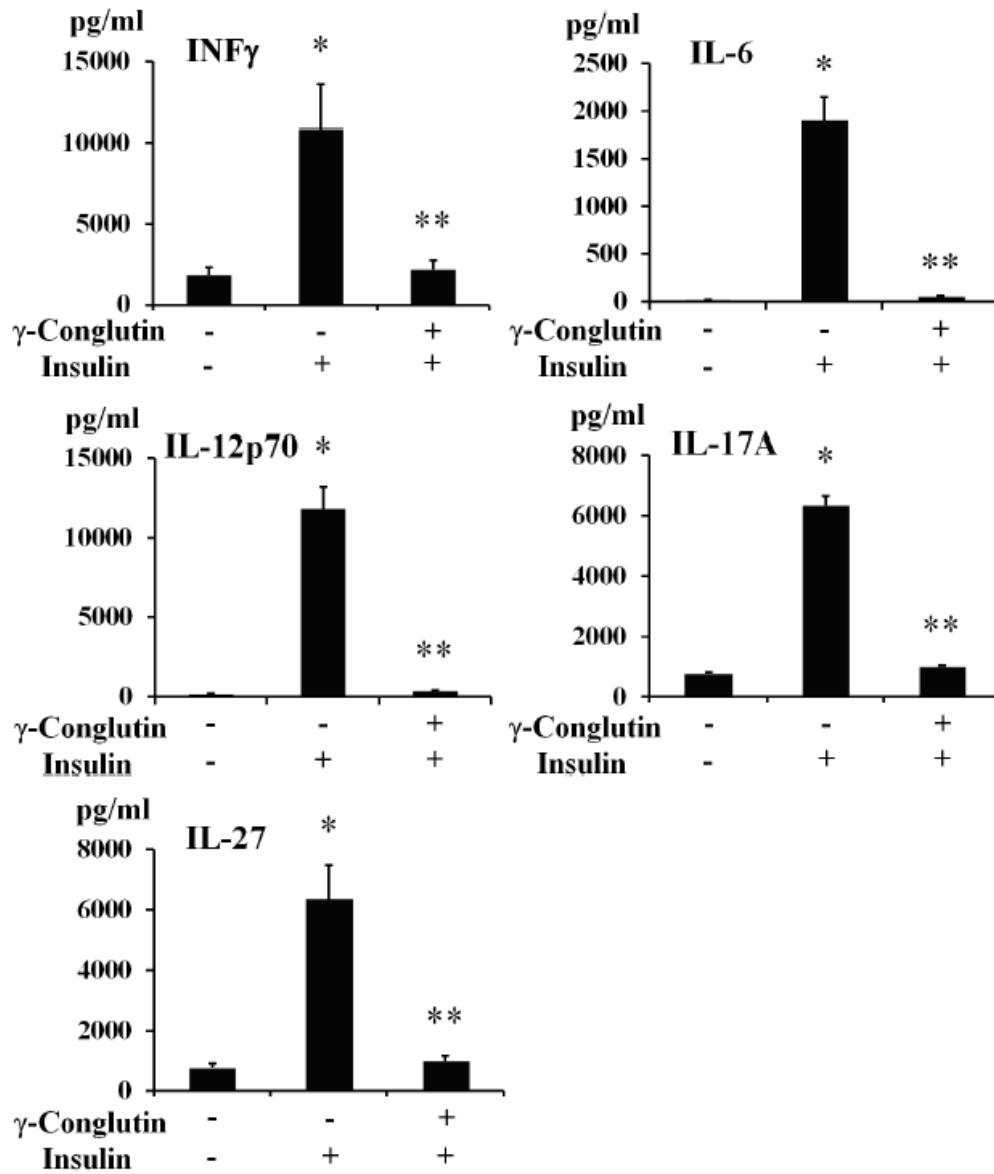

**Figure S2.** Effect of NLL  $\gamma$ -conglutinin on the protein levels of pro-inflammatory cytokines. Control PANC-1 cells, and IR-C pancreatic cells were cultured for 24 h alone, or the former with  $\gamma$ -conglutinin protein. The bar graph shows protein levels determined by ELISA of INF $\gamma$ , IL-6, IL-12, IL-17, and IL-27. Data represent mean  $\pm$  SD from three independent experiments. C: Untreated control culture cells; IR-C: insulin resistant culture cells; IR-C+ $\gamma$ : IRC+ $\gamma$ -conglutinin challenge.  $p < 0.05$  represent statistically significant differences associated with each figure.  $p^* < 0.05$  IR-C versus C;  $p^{**} < 0.05$  IR-C+ $\gamma$ -conglutinin versus IR-C.

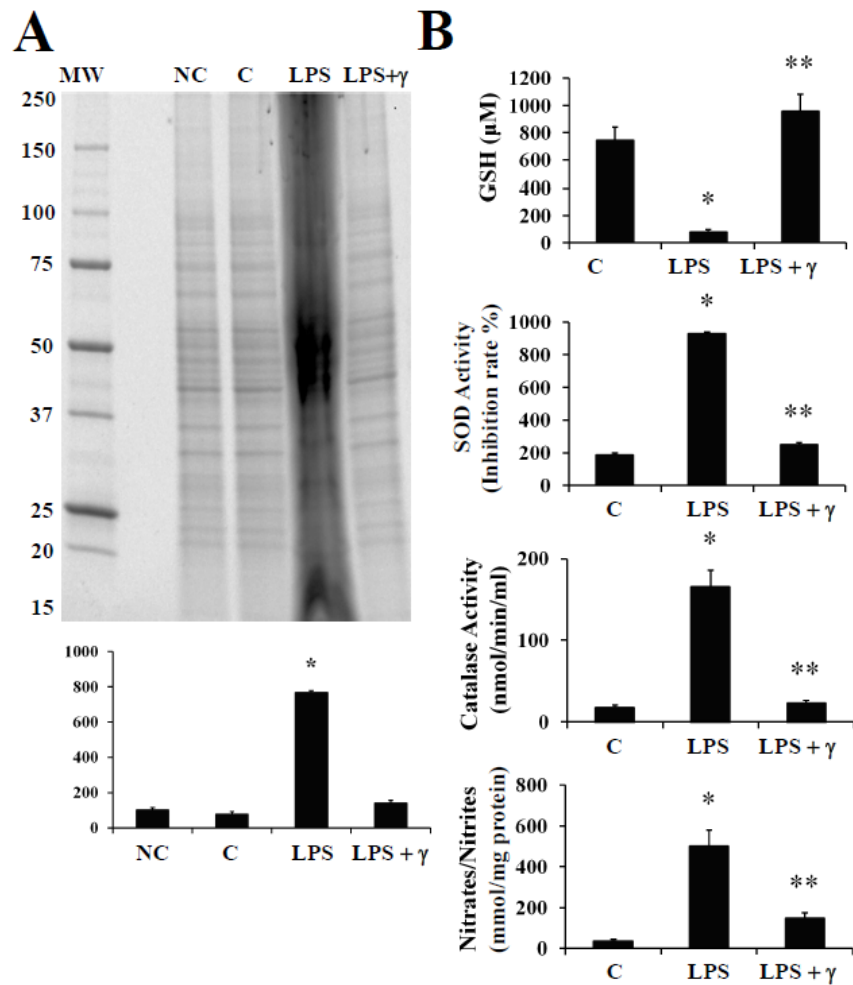

**Figure S3.** Effect of  $\gamma$ -conglutin on proteins oxidative modifications, antioxidant enzymatic activities and production of GSH and NO. **(A)** Changes in protein carbonyl formation were measured in LPS-treated pancreatic cells after 24 h of incubation with LPS and/or  $\gamma$ -conglutin. Protein carbonyls were measured using an OxyBlot kit. Representative blots show basal carbonylation levels in C control PANC-1 cells, LPS-treated pancreatic cells, and LPS-treated pancreatic cells challenged with  $\gamma$ -conglutin. Graph y-axis represents arbitrary densitometry units.  $p^* < 0.05$  LPS-treated pancreatic cells *versus* C cells. **(B)** LPS-treated pancreatic cells were incubated for 24 h with  $\gamma$ -conglutin protein. GSH and NO production, as well as SOD and catalase activities were measured. Data represent mean  $\pm$  SD from three independent experiments.  $p < 0.05$  represent statistically significant differences associated with each figure.  $p^* < 0.05$  LPS-treated pancreatic cells *versus* C (control PANC-1) cells;  $p^{**} < 0.05$  LPS + -conglutin treated pancreatic cells *versus* LPS-treated pancreatic cells.

**Supplementary Table S1.  $\gamma$ -conglutin peptides mass fingerprinting characterization.**

| Band <sup>1</sup> | Sequence of $\gamma$ -conglutin protein <sup>2</sup>                                                                                                                                                                                                                                                                                                                                                                                                                                      | identification                                                                 | Sequence     |                    |
|-------------------|-------------------------------------------------------------------------------------------------------------------------------------------------------------------------------------------------------------------------------------------------------------------------------------------------------------------------------------------------------------------------------------------------------------------------------------------------------------------------------------------|--------------------------------------------------------------------------------|--------------|--------------------|
|                   |                                                                                                                                                                                                                                                                                                                                                                                                                                                                                           |                                                                                | coverage (%) | Score <sup>3</sup> |
| 1                 | MARNMAHILHILVISLSYSFLFVSSSSQDSQSLYHNSQPTSSKPNLLVLPVQEDASTGLH<br>WANIHKRTPLMQVPLLLDLNGKHLWVTCSEQHYSSSTYQAPFCHSTQCSRANTHCQFTCTD<br>STTRPGCHNNTCGLSSNPVTQESGLGELAQDVLAHSTHSGSKLGPMVKVPQFLFSCAP<br>SFLAQKGLPNNVQGALGLGQAPIISLQNQLFHFGLKQFQSVCLSRYSTSNGAILFGDIND<br>PNNNNYIHNSLDVLHDLVYTPLTISKQGEYFIQVNAIRVKNHLVIPTKNPFISPSSTSYH<br>GSGEIGGALITTHPYTVLSHSIFEVFTQVFANMMPKQAVKAVGPFGLCYDSRKISGGA<br>PSVDLILDKNDVWRISSENFVQAQDGVSCGLGFVDGGVHARAGIALGAHHLEENLVVFD<br>LERSRVGFNSNSLKSYGKTCSNLFDLNNP | Conglutin gamma<br><i>Lupinus angustifolius</i><br>(Narrow-leaved blue lupine) | 26.3         | 90.2               |
| 2                 | MARNMAHILHILVISLSYSFLFVSSSSQDSQSLYHNSQPTSSKPNLLVLPVQEDASTGLH<br>WANIHKRTPLMQVPLLLDLNGKHLWVTCSEQHYSSSTYQAPFCHSTQCSRANTHCQFTCTD<br>STTRPGCHNNTCGLSSNPVTQESGLGELAQDVLAHSTHSGSKLGPMVKVPQFLFSCAP<br>SFLAQKGLPNNVQGALGLGQAPIISLQNQLFHFGLKQFQSVCLSRYSTSNGAILFGDIND<br>PNNNNYIHNSLDVLHDLVYTPLTISKQGEYFIQVNAIRVKNHLVIPTKNPFISPSSTSYH<br>GSGEIGGALITTHPYTVLSHSIFEVFTQVFANMMPKQAVKAVGPFGLCYDSRKISGGA<br>PSVDLILDKNDVWRISSENFVQAQDGVSCGLGFVDGGVHARAGIALGAHHLEENLVVFD<br>LERSRVGFNSNSLKSYGKTCSNLFDLNNP | Conglutin gamma<br><i>Lupinus angustifolius</i><br>(Narrow-leaved blue lupine) | 18.4         | 60.2               |

**Table S2.** Cell viability (%) and dose effects of NLL  $\gamma$ -conglutin protein. Cytotoxicity of  $\gamma$ -conglutin protein on PANC-1-pancreatic cells. Cells were treated with 10, 25 and 50  $\mu$ g of sample proteins for 24 h. Cell viability after treatment with LPS (1  $\mu$ g) was  $99.0 \pm 1.4\%$ . Data represent mean  $\pm$  SD from three independent experiments. Controls were performed using PANC-1 cells without any treatment with LPS and/or  $\gamma$ -conglutin protein.  $p < 0.05$  represent statistically significant differences associated with the table.  $p^* < 0.05$  treated cells versus untreated control PANC-1 cells.

| Samples                               | 10 $\mu$ g     | 25 $\mu$ g     | 50 $\mu$ g       |
|---------------------------------------|----------------|----------------|------------------|
| $\gamma$ -conglutin                   | $97.2 \pm 1.5$ | $99.6 \pm 2.4$ | $82.0 \pm 2.6^*$ |
| LPS (1 $\mu$ g) + $\gamma$ -conglutin | $97.6 \pm 2.8$ | $99.8 \pm 2.4$ | $81.0 \pm 1.3^*$ |

**Table 3.** Cell viability (%) on insulin resistance IR-C cell model. PANC-1 cells were treated with increasing ( $10^{-9}$ ,  $10^{-8}$ ,  $10^{-7}$ ,  $10^{-6}$ ,  $10^{-5}$  nmol/L) insulin quantities. Data represent cell viability (%) mean  $\pm$  SD from three independent experiments.  $p < 0.05$  represent statistically significant differences associated with the table.  $p^* < 0.05$  treated cells versus untreated control PANC-1 cells.

| Insulin (nmol/L) | % viability      |
|------------------|------------------|
| $10^{-9}$        | $99.5 \pm 1.5$   |
| $10^{-8}$        | $99.4 \pm 1.2$   |
| $10^{-7}$        | $99.1 \pm 1.5$   |
| $10^{-6}$        | $95.4 \pm 1.6^*$ |
| $10^{-5}$        | $94.7 \pm 1.8^*$ |

**Table S4.** Cell viability (%) and dose effects of purified NLL  $\gamma$ -conglutin protein on insulin resistance cell (IR-C) model. Cytotoxicity of  $\gamma$ -conglutin protein on IR-C pancreatic cells. Cells were treated with 10, 25 and 50  $\mu$ g of sample proteins for 24 h. Data represent cell viability (%) mean  $\pm$  SD from three

independent experiments. Control samples were assayed only with insulin ( $10^{-7}$  nm/L) showing 100% of cell viability.  $p < 0.05$  represent statistically significant differences associated with the table.  $p^* < 0.05$  treated cells versus untreated control PANC-1 cells.

| Sample                      | 10 $\mu$ g     | 25 $\mu$ g     | 50 $\mu$ g       |
|-----------------------------|----------------|----------------|------------------|
| $\gamma$ -conglutin protein | $98.6 \pm 2.8$ | $99.0 \pm 1.8$ | $80.0 \pm 0.8^*$ |

**Table S5.** Fold-change in protein levels of pro-inflammatory cytokines and iNOS. Numbers represent fold-changes calculated versus LPS from data in Figures 1 and 2 for a) LPS-induced inflammation model; and versus IR-C from data in Figure 5 and Supplementary Figure S2 for b) IR model. Positive and negative values mean up-and down-regulated genes, respectively.

a)

| Cytokines    | $\gamma$ -conglutin + LPS |
|--------------|---------------------------|
| TNF $\alpha$ | -253                      |
| INF $\gamma$ | -12443                    |
| IL-1 $\beta$ | -146                      |
| IL-6         | -1849                     |
| IL-12p70     | -11792                    |
| IL-17A       | -5339                     |
| IL-27        | -6100                     |
| iNOS         | -258                      |

b)

| Cytokines    | $\gamma$ -conglutin + IR |
|--------------|--------------------------|
| TNF $\alpha$ | -146                     |
| INF $\gamma$ | -8644                    |
| IL-1 $\beta$ | -97                      |
| IL-6         | -1839                    |
| IL-12p70     | -11409                   |
| IL-17A       | -5659                    |
| IL-27        | -5339                    |
| iNOS         | -189                     |

**Table S6.** Fold-change in protein levels of pro-inflammatory cytokines and iNOS. Numbers represent fold-changes calculated versus control from data in Figures 1 and 2 for a) LPS-induced inflammation model; Figure 5 and Supplementary Figure S2 for b) IR model. Positive and negative values mean up-and down-regulated genes, respectively.

a)

| Cytokines    | LPS    | $\gamma$ -conglutin + LPS |
|--------------|--------|---------------------------|
| TNF $\alpha$ | +145   | -1                        |
| INF $\gamma$ | +11335 | -1100                     |
| IL-1 $\beta$ | +187   | -66                       |
| IL-6         | +2979  | -119                      |
| IL-12p70     | +12127 | +341                      |
| IL-17A       | +5632  | -492                      |
| IL-27        | +5676  | +300                      |
| iNOS         | +245   | -13                       |

b)

| Cytokines    | IR     | $\gamma$ -conglutin +IR |
|--------------|--------|-------------------------|
| TNF $\alpha$ | +173   | +18                     |
| INF $\gamma$ | +8994  | +350                    |
| IL-1 $\beta$ | +129   | +27                     |
| IL-6         | 1881   | +32                     |
| IL-12p70     | +11592 | +208                    |
| IL-17A       | +5553  | +214                    |
| IL-27        | +5231  | +218                    |
| iNOS         | +287   | +32                     |
